# Supplementary material for: Complexes of carborane acids linked by strong hydrogen bonds: acidity scales
Source: Royal Society of Chemistry journal article supplement (doi:10.1039/c6cp02867e), 2016-01-01
Supplement: c6cp02867e1.pdf [file c6cp02867e1.pdf]

**Supplementary Material to:**

**Complexes of carborane acids linked by strong hydrogen bonds;  
acidity scales**

by

Sławomir J. Grabowski\*

Faculty of Chemistry, University of the Basque Country and Donostia

International Physics Center (DIPC), P.K. 1072

20080 Donostia (Spain)

IKERBASQUE, Basque Foundation for Science

48011 Bilbao (Spain)

Fig. 1SI The molecular graphs of the  $\text{HAlF}_4$ ,  $\text{HPF}_6$  and  $\text{HBF}_4$  acids which could be rather treated as complexes of HF with  $\text{AlF}_3$ ,  $\text{PF}_5$  and  $\text{BF}_3$ , respectively. Big circles correspond to attractors, small green ones to the bond critical points, the bond paths are indicated (solid and broken lines). The  $\text{CCl}_4$  solvent results are presented; however those for the gas phase and the water solvent are very similar.

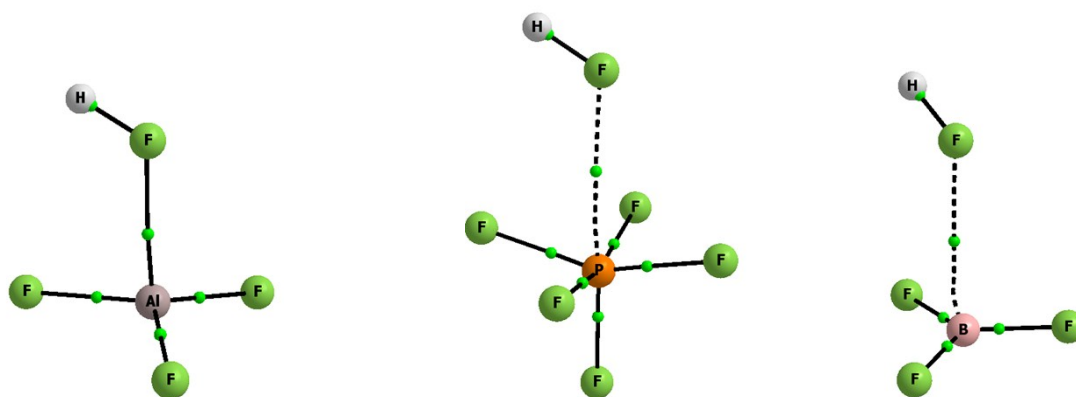

Fig. 2SI The histograms of the proton affinity values are presented based on the energies (Fig. 2SIa) and on the Gibbs free energies (Fig. 2SIb) where the water and  $\text{CCl}_4$  solvents and the gas phase are considered. The bases conjugate of the acids considered are indicated in the horizontal lines of figure; and the order (from left side to the right one) shows the lowering of the acidity of acids if the water solvent is taken into account (Series 1). Series 2 and 3 correspond to  $\text{CCl}_4$  solvent and to the gas phase, respectively.

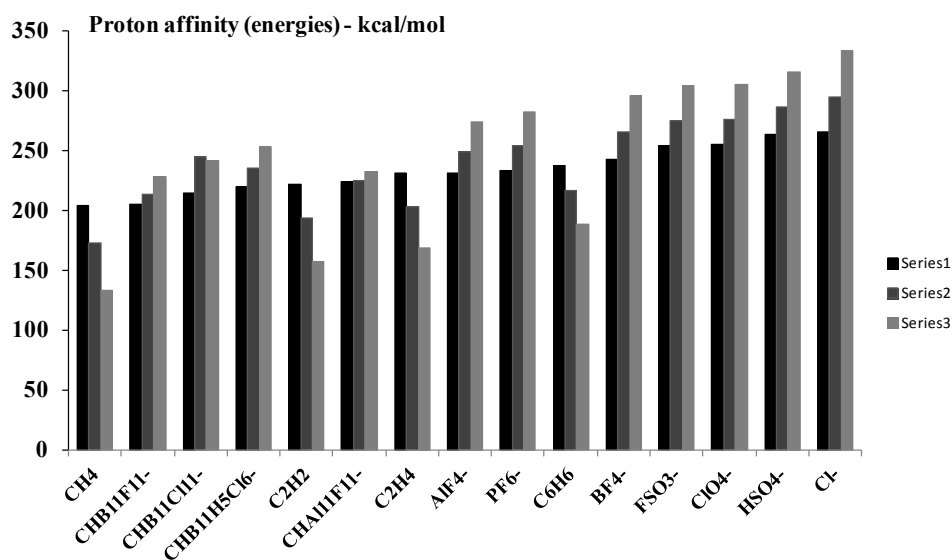

(a)

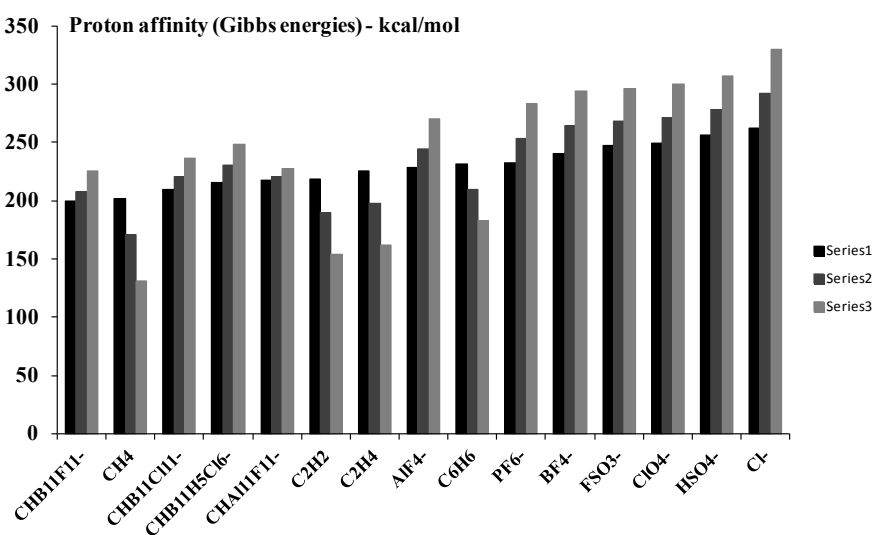

(b)

Fig. 3SI The relationships between the NH stretching frequency ( $\text{cm}^{-1}$ ) and the corresponding N-H bond length ( $\text{\AA}$ ).

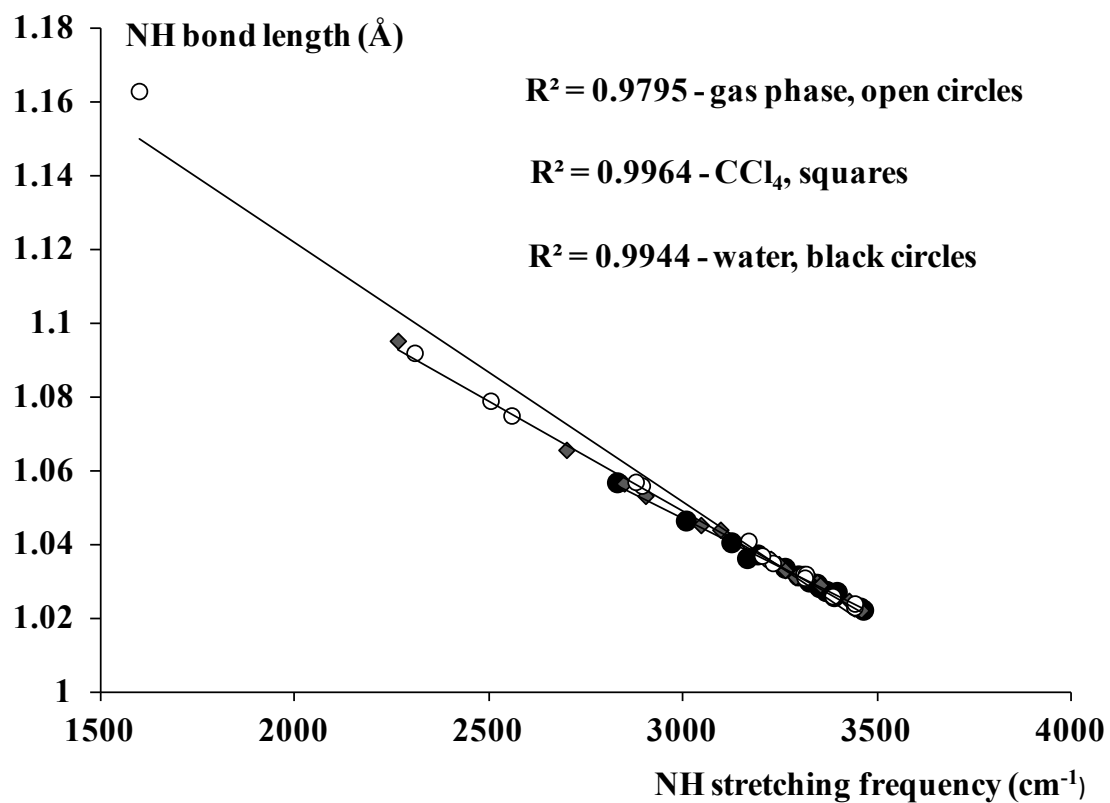

Fig. 4SI The molecular graph of the  $\text{HCHB}_{11}\text{F}_{11}\dots\text{C}_6\text{H}_7^+$  complex. Big circles correspond to attractors, small green ones to the bond critical points, the bond paths are indicated (solid and broken lines).

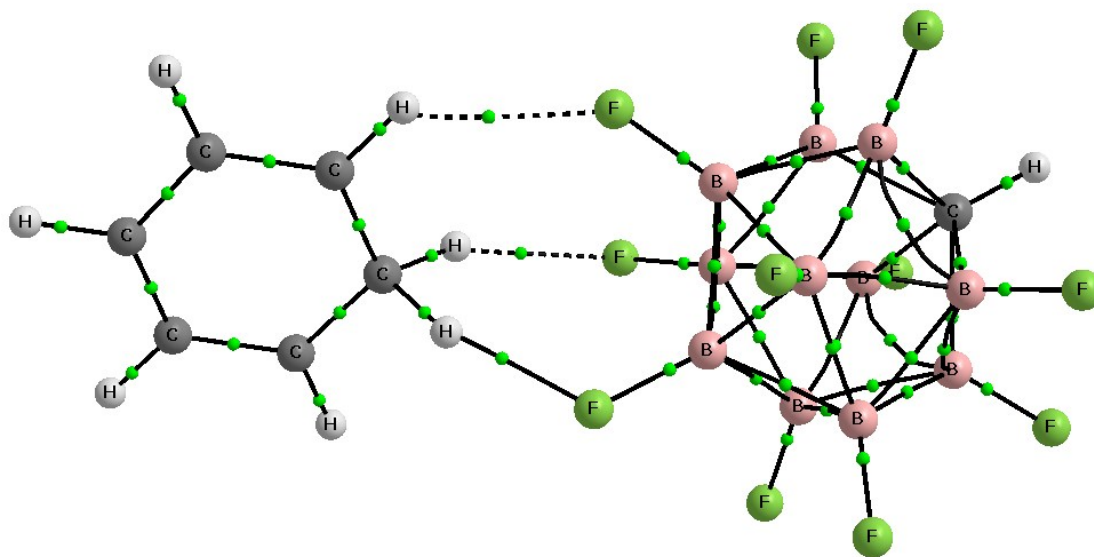

Fig. 5SI The histograms of the electron density at the F...H BCP (in au) are presented where the water or CCl<sub>4</sub> solvents and the gas phase are considered. The bases conjugate of the acids considered are indicated in the horizontal lines of figure; and the order (from left side to the right one) shows the lowering of the acidity of acids if the water solvent is taken into account (Series 1). Series 2 and 3 correspond to CCl<sub>4</sub> solvent and to the gas phase, respectively.

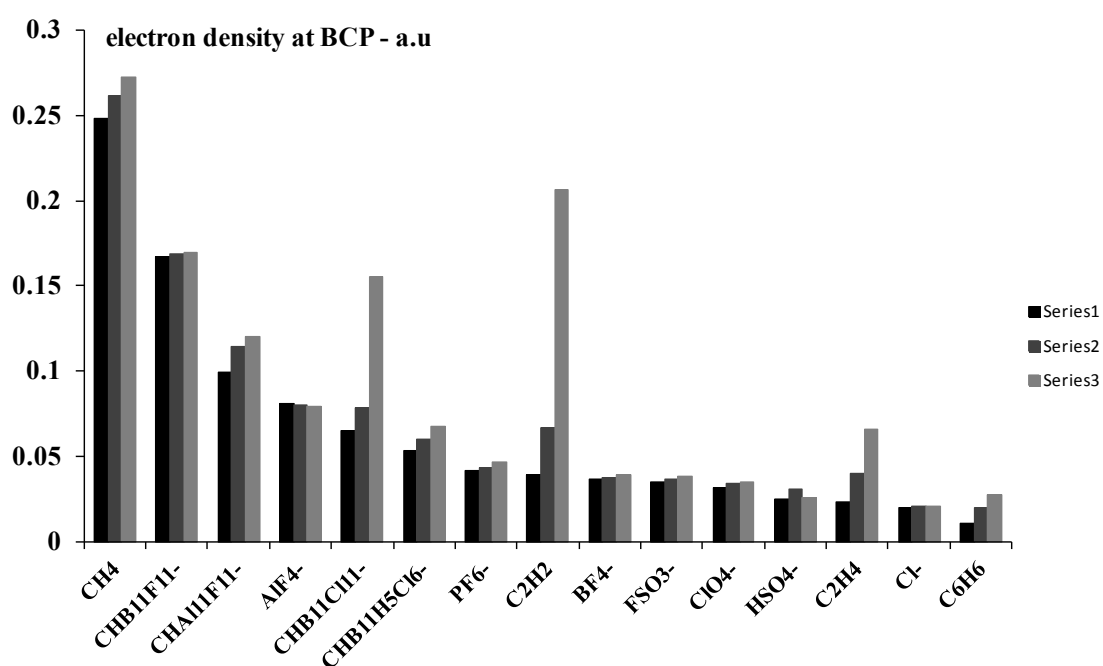

Fig. 6SI The histograms of the  $-V_{\text{BCP}}/G_{\text{BCP}}$  parameter at the F...H BCP (in au) are presented where the water or  $\text{CCl}_4$  solvents and the gas phase are considered. The bases conjugate of the acids considered are indicated in the horizontal lines of figure; and the order (from left side to the right one) shows the lowering of the acidity of acids if the water solvent is taken into account (Series 1). Series 2 and 3 correspond to  $\text{CCl}_4$  solvent and to the gas phase, respectively.

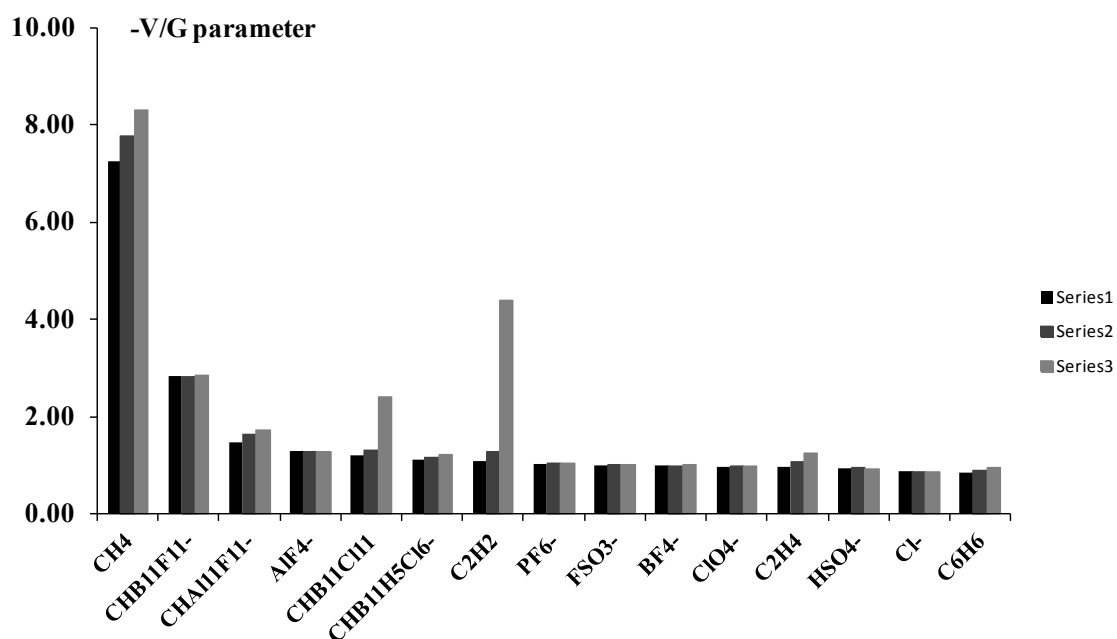

Table 1SI The NH bond lengths (in Å) for the trimethylammonium cation complexes with conjugate bases; gas phase, water solvent and CCl<sub>4</sub> solvent results presented.

| Base                                                          | NH gas | NH CCl <sub>4</sub> | NH H <sub>2</sub> O |
|---------------------------------------------------------------|--------|---------------------|---------------------|
| CHB <sub>11</sub> H <sub>5</sub> Cl <sub>6</sub> <sup>-</sup> | 1.032  | 1.030               | 1.027               |
| CHB <sub>11</sub> Cl <sub>11</sub> <sup>-</sup>               | 1.032  | 1.029               | 1.026               |
| CHB <sub>11</sub> F <sub>11</sub> <sup>-</sup>                | 1.024  | 1.030               | 1.027               |
| CHAl <sub>11</sub> F <sub>11</sub> <sup>-</sup>               | 1.036  | 1.035               | 1.032               |
| BF <sub>4</sub> <sup>-</sup>                                  | 1.056  | 1.044               | 1.034               |
| AlF <sub>4</sub> <sup>-</sup>                                 | 1.057  | 1.045               | 1.036               |
| C <sub>6</sub> H <sub>6</sub>                                 | 1.031  | 1.030               | 1.027               |
| C <sub>2</sub> H <sub>2</sub>                                 | 1.035  | 1.031               | 1.028               |
| C <sub>2</sub> H <sub>4</sub>                                 | 1.037  | 1.033               | 1.030               |
| CH <sub>4</sub>                                               | 1.026  | 1.025               | 1.023               |
| ClO <sub>4</sub> <sup>-</sup>                                 | 1.075  | 1.053               | 1.037               |
| Cl <sup>-</sup>                                               | 1.163  | 1.095               | 1.057               |
| FSO <sub>3</sub> <sup>-</sup>                                 | 1.079  | 1.057               | 1.041               |
| HSO <sub>4</sub> <sup>-</sup>                                 | 1.092  | 1.066               | 1.047               |
| PF <sub>6</sub> <sup>-</sup>                                  | 1.041  | 1.036               | 1.029               |

The N-H bond length for NH(CH<sub>3</sub>)<sub>3</sub><sup>+</sup> not involved in any interaction is equal 1.023, 1.022 and 1.022 Å for gas phase, CCl<sub>4</sub> and water, respectively.



Table 2SI The interaction energies (in kcal/mol),  $E_1$  and  $E_2$  (defined in the main text and also explained in Scheme 1); for the gas phase, water solvent and  $\text{CCl}_4$  solvent.

| Base                                     | $E_1$ gas | $E_2$ gas | $E_1$ $\text{CCl}_4$ | $E_2$ $\text{CCl}_4$ | $E_1$ $\text{H}_2\text{O}$ | $E_2$ $\text{H}_2\text{O}$ |
|------------------------------------------|-----------|-----------|----------------------|----------------------|----------------------------|----------------------------|
| $\text{CHB}_{11}\text{H}_5\text{Cl}_6^-$ | -15.0     | -39.8     | -9.2                 | -30.5                | -5.2                       | -19.7                      |
| $\text{CHB}_{11}\text{Cl}_{11}^-$        | -17.3     | -30.0     | -10.7                | -42.2                | -4.4                       | -13.3                      |
| $\text{CHB}_{11}\text{F}_{11}^-$         | -33.5     | -33.5     | -24.8                | -24.8                | -15.5                      | -15.5                      |
| $\text{CHAl}_{11}\text{F}_{11}^-$        | -35.4     | -39.0     | -22.0                | -33.1                | -9.9                       | -27.8                      |
| $\text{BF}_4^-$                          | -12.1     | -79.3     | -8.2                 | -60.1                | -4.8                       | -41.4                      |
| $\text{AlF}_4^-$                         | -23.1     | -68.7     | -16.8                | -52.1                | -10.2                      | -36.2                      |
| $\text{C}_6\text{H}_6$                   | -65.9     | -25.6     | -28.4                | -30.9                | -2.0                       | -34.0                      |
| $\text{C}_2\text{H}_2$                   | -89.2     | -18.2     | -39.1                | -19.0                | -4.7                       | -20.7                      |
| $\text{C}_2\text{H}_4$                   | -81.8     | -21.4     | -35.5                | -25.4                | -3.0                       | -28.8                      |
| $\text{CH}_4$                            | -101.8    | -6.5      | -46.8                | -5.9                 | -5.5                       | -4.0                       |
| $\text{ClO}_4^-$                         | -12.3     | -88.7     | -8.1                 | -70.8                | -4.3                       | -53.3                      |
| $\text{Cl}^-$                            | -6.5      | -110.7    | -4.2                 | -85.7                | -2.1                       | -61.7                      |
| $\text{FSO}_3^-$                         | -13.6     | -88.7     | -9.1                 | -70.9                | -4.8                       | -53.5                      |
| $\text{HSO}_4^-$                         | -15.1     | -101.8    | -7.5                 | -80.2                | -4.0                       | -62.2                      |
| $\text{PF}_6^-$                          | -13.1     | -67.0     | -9.3                 | -50.1                | -5.6                       | -33.5                      |

Table 3SI QTAIM parameters (au), gas phase, for BCP1 and BCP2 (shown in Scheme 1 of the main text); the F...H distances corresponding to BCP1 included (Å).

| Base                                                          | BCP1                |                  |                  |                  |                             |       | BCP2                |                  |                  |                  |                             |
|---------------------------------------------------------------|---------------------|------------------|------------------|------------------|-----------------------------|-------|---------------------|------------------|------------------|------------------|-----------------------------|
|                                                               | $\rho_{\text{BCP}}$ | $G_{\text{BCP}}$ | $V_{\text{BCP}}$ | $H_{\text{BCP}}$ | $\nabla^2\rho_{\text{BCP}}$ | F...H | $\rho_{\text{BCP}}$ | $G_{\text{BCP}}$ | $V_{\text{BCP}}$ | $H_{\text{BCP}}$ | $\nabla^2\rho_{\text{BCP}}$ |
| CHB <sub>11</sub> H <sub>5</sub> Cl <sub>6</sub> <sup>-</sup> | 0.0676              | 0.0576           | -0.0698          | -0.0122          | 0.1814                      | 1.477 | 0.1986              | 0.0375           | -0.2067          | -0.1692          | -0.5271                     |
| CHB <sub>11</sub> Cl <sub>11</sub> <sup>-</sup>               | 0.1549              | 0.0970           | -0.2326          | -0.1356          | -0.1544                     | 1.178 | 0.1262              | 0.0413           | -0.1207          | -0.0794          | -0.1524                     |
| CHB <sub>11</sub> F <sub>11</sub> <sup>-</sup>                | 0.1694              | 0.1069           | -0.3029          | -0.1960          | -0.3562                     | 1.133 | 0.1694              | 0.1069           | -0.3029          | -0.1960          | -0.3562                     |
| CHAl <sub>11</sub> F <sub>11</sub> <sup>-</sup>               | 0.1203              | 0.0997           | -0.1709          | -0.0711          | 0.1142                      | 1.256 | 0.2235              | 0.2235           | -0.4822          | -0.2587          | -0.1407                     |
| BF <sub>4</sub> <sup>-</sup>                                  | 0.0388              | 0.0408           | -0.0405          | 0.0003           | 0.1645                      | 1.632 | 0.3324              | 0.0750           | -0.7769          | -0.7019          | -2.5074                     |
| AlF <sub>4</sub> <sup>-</sup>                                 | 0.0797              | 0.0767           | -0.0979          | -0.0212          | 0.2219                      | 1.388 | 0.2720              | 0.0811           | -0.6118          | -0.5307          | -1.7982                     |
| C <sub>6</sub> H <sub>6</sub>                                 | 0.0274              | 0.0236           | -0.0222          | 0.0015           | 0.1005                      | 1.869 | 0.2446              | 0.0359           | -0.2614          | -0.2254          | -0.7580                     |
| C <sub>2</sub> H <sub>2</sub>                                 | 0.2067              | 0.0912           | -0.4001          | -0.3089          | -0.8705                     | 1.086 | 0.0793              | 0.0332           | -0.0666          | -0.0334          | -0.0007                     |
| C <sub>2</sub> H <sub>4</sub>                                 | 0.0660              | 0.0535           | -0.0668          | -0.0133          | 0.1605                      | 1.510 | 0.1590              | 0.0436           | -0.1441          | -0.1005          | -0.2273                     |
| CH <sub>4</sub>                                               | 0.2722              | 0.0724           | -0.6014          | -0.5289          | -1.8260                     | 0.997 | 0.0448              | 0.0271           | -0.0359          | -0.0089          | 0.0729                      |
| ClO <sub>4</sub> <sup>-</sup>                                 | 0.0351              | 0.0349           | -0.0343          | 0.0007           | 0.1425                      | 1.699 | 0.3289              | 0.0597           | -0.7000          | -0.6403          | -2.3221                     |
| Cl <sup>-</sup>                                               | 0.0208              | 0.0186           | -0.0159          | 0.0027           | 0.0851                      | 1.919 | 0.2357              | 0.0462           | -0.2587          | -0.2125          | -0.6653                     |
| FSO <sub>3</sub> <sup>-</sup>                                 | 0.0384              | 0.0383           | -0.0386          | -0.0003          | 0.1517                      | 1.660 | 0.3226              | 0.0588           | -0.6899          | -0.6311          | -2.2890                     |
| HSO <sub>4</sub> <sup>-</sup>                                 | 0.0259              | 0.0249           | -0.0232          | 0.0018           | 0.1068                      | 1.831 | 0.3403              | 0.0625           | -0.7272          | -0.6646          | -2.4085                     |
| PF <sub>6</sub> <sup>-</sup>                                  | 0.0464              | 0.0480           | -0.0503          | -0.0023          | 0.1826                      | 1.570 | 0.3194              | 0.0741           | -0.7410          | -0.6669          | -2.3714                     |

Table 4SI QTAIM parameters (au), CCl<sub>4</sub> solvent, for BCP1 and BCP2 (shown in Scheme 1 of the main text); the F...H distances corresponding to BCP1 included (Å).

| Base                                                          | BCP1                |                  |                  |                  |                             |       | BCP2                |                  |                  |                  |                             |
|---------------------------------------------------------------|---------------------|------------------|------------------|------------------|-----------------------------|-------|---------------------|------------------|------------------|------------------|-----------------------------|
|                                                               | $\rho_{\text{BCP}}$ | $G_{\text{BCP}}$ | $V_{\text{BCP}}$ | $H_{\text{BCP}}$ | $\nabla^2\rho_{\text{BCP}}$ | F...H | $\rho_{\text{BCP}}$ | $G_{\text{BCP}}$ | $V_{\text{BCP}}$ | $H_{\text{BCP}}$ | $\nabla^2\rho_{\text{BCP}}$ |
| CHB <sub>11</sub> H <sub>5</sub> Cl <sub>6</sub> <sup>-</sup> | 0.0601              | 0.0521           | -0.0605          | -0.0084          | 0.1745                      | 1.516 | 0.2046              | 0.0371           | -0.2146          | -0.1775          | -0.5616                     |
| CHB <sub>11</sub> Cl <sub>11</sub> <sup>-</sup>               | 0.0787              | 0.0641           | -0.0834          | -0.0193          | 0.1793                      | 1.421 | 0.1850              | 0.0373           | -0.1894          | -0.1522          | -0.4597                     |
| CHB <sub>11</sub> F <sub>11</sub> <sup>-</sup>                | 0.1686              | 0.1065           | -0.3007          | -0.1942          | -0.3510                     | 1.141 | 0.1686              | 0.1065           | -0.3007          | -0.1942          | -0.3510                     |
| CHAl <sub>11</sub> F <sub>11</sub> <sup>-</sup>               | 0.1144              | 0.0966           | -0.1582          | -0.0616          | 0.1399                      | 1.271 | 0.2287              | 0.0949           | -0.4972          | -0.4023          | -1.2293                     |
| BF <sub>4</sub> <sup>-</sup>                                  | 0.0372              | 0.0390           | -0.0383          | 0.0007           | 0.1590                      | 1.648 | 0.3346              | 0.0752           | -0.7826          | -0.7073          | -2.5284                     |
| AlF <sub>4</sub> <sup>-</sup>                                 | 0.0805              | 0.0774           | -0.0992          | -0.0218          | 0.2223                      | 1.383 | 0.2706              | 0.0812           | -0.6080          | -0.5268          | -1.7823                     |
| C <sub>6</sub> H <sub>6</sub>                                 | 0.0197              | 0.0161           | -0.0144          | 0.0017           | 0.0712                      | 2.013 | 0.2513              | 0.0361           | -0.2717          | -0.2356          | -0.7983                     |
| C <sub>2</sub> H <sub>2</sub>                                 | 0.0671              | 0.0532           | -0.0680          | -0.0148          | 0.1539                      | 1.494 | 0.1673              | 0.0482           | -0.1604          | -0.1122          | -0.2561                     |
| C <sub>2</sub> H <sub>4</sub>                                 | 0.0400              | 0.0323           | -0.0346          | -0.0023          | 0.1198                      | 1.712 | 0.1738              | 0.0515           | -0.1648          | -0.1133          | -0.2472                     |
| CH <sub>4</sub>                                               | 0.2614              | 0.0735           | -0.5704          | -0.4969          | -1.6935                     | 1.009 | 0.0494              | 0.0293           | -0.0410          | -0.0117          | 0.0702                      |
| ClO <sub>4</sub> <sup>-</sup>                                 | 0.0338              | 0.0336           | -0.0327          | 0.0009           | 0.1382                      | 1.712 | 0.3299              | 0.0597           | -0.7022          | -0.6425          | -2.3311                     |
| Cl <sup>-</sup>                                               | 0.0204              | 0.0180           | -0.0155          | 0.0025           | 0.0823                      | 1.931 | 0.2362              | 0.0464           | -0.2596          | -0.2132          | -0.6672                     |
| FSO <sub>3</sub> <sup>-</sup>                                 | 0.0368              | 0.0366           | -0.0366          | 0.0001           | 0.1467                      | 1.676 | 0.3243              | 0.0587           | -0.6939          | -0.6351          | -2.3056                     |
| HSO <sub>4</sub> <sup>-</sup>                                 | 0.0312              | 0.0311           | -0.0296          | 0.0015           | 0.1302                      | 1.738 | 0.3324              | 0.0600           | -0.7111          | -0.6512          | -2.3649                     |
| PF <sub>6</sub> <sup>-</sup>                                  | 0.0436              | 0.0450           | -0.0463          | -0.0014          | 0.1745                      | 1.593 | 0.3229              | 0.0738           | -0.7507          | -0.6768          | -2.4119                     |

Table 5SI QTAIM parameters (au), water solvent, for BCP1 and BCP2 (shown in Scheme 1 of the main text); the F...H distances corresponding to BCP1 included (Å).

| Base                                                          | BCP1                |                  |                  |                  |                             |       | BCP2                |                  |                  |                  |                             |
|---------------------------------------------------------------|---------------------|------------------|------------------|------------------|-----------------------------|-------|---------------------|------------------|------------------|------------------|-----------------------------|
|                                                               | $\rho_{\text{BCP}}$ | $G_{\text{BCP}}$ | $V_{\text{BCP}}$ | $H_{\text{BCP}}$ | $\nabla^2\rho_{\text{BCP}}$ | F...H | $\rho_{\text{BCP}}$ | $G_{\text{BCP}}$ | $V_{\text{BCP}}$ | $H_{\text{BCP}}$ | $\nabla^2\rho_{\text{BCP}}$ |
| CHB <sub>11</sub> H <sub>5</sub> Cl <sub>6</sub> <sup>-</sup> | 0.0536              | 0.0466           | -0.0522          | -0.0056          | 0.1638                      | 1.558 | 0.2089              | 0.0367           | -0.2200          | -0.1833          | -0.5862                     |
| CHB <sub>11</sub> Cl <sub>11</sub> <sup>-</sup>               | 0.0649              | 0.0546           | -0.0657          | -0.0111          | 0.1737                      | 1.487 | 0.1953              | 0.0360           | -0.2025          | -0.1665          | -0.5218                     |
| CHB <sub>11</sub> F <sub>11</sub> <sup>-</sup>                | 0.1672              | 0.1054           | -0.2973          | -0.1919          | -0.3461                     | 1.142 | 0.1672              | 0.1054           | -0.2973          | -0.1919          | -0.3461                     |
| CHAl <sub>11</sub> F <sub>11</sub> <sup>-</sup>               | 0.0997              | 0.0882           | -0.1300          | -0.0418          | 0.1860                      | 1.314 | 0.2423              | 0.0886           | -0.5347          | -0.4461          | -1.4300                     |
| BF <sub>4</sub> <sup>-</sup>                                  | 0.0369              | 0.0381           | -0.0375          | 0.0006           | 0.1550                      | 1.658 | 0.3359              | 0.0761           | -0.7850          | -0.7088          | -2.5310                     |
| AlF <sub>4</sub> <sup>-</sup>                                 | 0.0810              | 0.0775           | -0.0998          | -0.0223          | 0.2208                      | 1.381 | 0.2688              | 0.0811           | -0.6028          | -0.5217          | -1.7622                     |
| C <sub>6</sub> H <sub>6</sub>                                 | 0.0105              | 0.0080           | -0.0067          | 0.0012           | 0.0369                      | 2.303 | 0.2570              | 0.0363           | -0.2803          | -0.2440          | -0.8310                     |
| C <sub>2</sub> H <sub>2</sub>                                 | 0.0392              | 0.0320           | -0.0343          | -0.0023          | 0.1190                      | 1.695 | 0.1856              | 0.0556           | -0.1847          | -0.1292          | -0.2944                     |
| C <sub>2</sub> H <sub>4</sub>                                 | 0.0234              | 0.0178           | -0.0170          | 0.0008           | 0.0743                      | 1.902 | 0.1801              | 0.0561           | -0.1748          | -0.1188          | -0.2509                     |
| CH <sub>4</sub>                                               | 0.2484              | 0.0737           | -0.5338          | -0.4600          | -1.5451                     | 1.024 | 0.0533              | 0.0305           | -0.0448          | -0.0143          | 0.0650                      |
| ClO <sub>4</sub> <sup>-</sup>                                 | 0.0321              | 0.0317           | -0.0304          | 0.0013           | 0.1316                      | 1.733 | 0.3311              | 0.0596           | -0.7050          | -0.6453          | -2.3428                     |
| Cl <sup>-</sup>                                               | 0.0202              | 0.0176           | -0.0152          | 0.0024           | 0.0804                      | 1.939 | 0.2364              | 0.0465           | -0.2599          | -0.2135          | -0.6679                     |
| FSO <sub>3</sub> <sup>-</sup>                                 | 0.0351              | 0.0346           | -0.0342          | 0.0004           | 0.1398                      | 1.696 | 0.3253              | 0.0586           | -0.6961          | -0.6375          | -2.3158                     |
| HSO <sub>4</sub> <sup>-</sup>                                 | 0.0250              | 0.0240           | -0.0221          | 0.0018           | 0.1032                      | 1.753 | 0.3390              | 0.0617           | -0.7228          | -0.6612          | -2.3981                     |
| PF <sub>6</sub> <sup>-</sup>                                  | 0.0421              | 0.0437           | -0.0445          | -0.0008          | 0.1714                      | 1.605 | 0.3259              | 0.0740           | -0.7591          | -0.6850          | -2.4439                     |

Table 6SI QTAIM parameters (au), gas phase, CCl<sub>4</sub> solvent and water solvent, for BCP corresponding to intermolecular contact (specified in the second left column) for complexes of HF with BF<sub>3</sub>, AlF<sub>3</sub> and PF<sub>5</sub> species (or for HBF<sub>4</sub>, HAlF<sub>4</sub> and HPF<sub>6</sub> acids, respectively).

| Acid              | Contact | gas phase           |                  |                             | CCl <sub>4</sub>    |                  |                             | water               |                  |                             |
|-------------------|---------|---------------------|------------------|-----------------------------|---------------------|------------------|-----------------------------|---------------------|------------------|-----------------------------|
|                   |         | $\rho_{\text{BCP}}$ | $H_{\text{BCP}}$ | $\nabla^2\rho_{\text{BCP}}$ | $\rho_{\text{BCP}}$ | $H_{\text{BCP}}$ | $\nabla^2\rho_{\text{BCP}}$ | $\rho_{\text{BCP}}$ | $H_{\text{BCP}}$ | $\nabla^2\rho_{\text{BCP}}$ |
| HBF <sub>4</sub>  | F...B   | 0.013               | 0.000            | 0.047                       | 0.013               | 0.001            | 0.050                       | 0.014               | 0.001            | 0.054                       |
| HAlF <sub>4</sub> | F...Al  | 0.036               | 0.003            | 0.224                       | 0.038               | 0.005            | 0.259                       | 0.041               | 0.008            | 0.310                       |
| HPF <sub>6</sub>  | F...P   | 0.006               | 0.001            | 0.031                       | 0.018               | 0.000            | 0.059                       | 0.020               | 0.000            | 0.063                       |
